# Supplementary material
Source: PubMed Central journal article supplement (PMC4712924)
Supplement: NIHMS749307-supplement-SI.pdf [file NIHMS749307-supplement-SI.pdf]

Supplementary information S1 (table) | Genetic code flexibility in microorganisms

| Organisms and organelles | Mechanism | References |
|--------------------------|-----------|------------|
|--------------------------|-----------|------------|

**Biased codon usage**

|                   |                          |                                      |   |
|-------------------|--------------------------|--------------------------------------|---|
| Synonymous codons | Most sequenced organisms | Mutational bias or natural selection | 1 |
|-------------------|--------------------------|--------------------------------------|---|

**Codon reassignment**

|                             |                                                                                                                                                                                                                                                                                                                        |                                                                                                                                                                                          |         |
|-----------------------------|------------------------------------------------------------------------------------------------------------------------------------------------------------------------------------------------------------------------------------------------------------------------------------------------------------------------|------------------------------------------------------------------------------------------------------------------------------------------------------------------------------------------|---------|
| AUA: Ile→Met                | Mitochondria of most metazoa and yeasts                                                                                                                                                                                                                                                                                | Loss of tRNA <sup>Ile</sup> <sub>CAU</sub> and t <sup>5</sup> C modification of tRNA <sup>Met</sup> <sub>CAU</sub>                                                                       | 2       |
| CUN <sup>a</sup> : Leu→Thr  | Mitochondria of <i>Saccharomyces</i> spp.                                                                                                                                                                                                                                                                              | Loss of tRNA <sup>Leu</sup> <sub>UAG</sub> ; evolution of tRNA <sup>Thr</sup> <sub>CAU</sub> from tRNA <sup>His</sup>                                                                    | 3,4     |
| CUA/CUU: Leu→Ala            | Mitochondria of <i>Ashbya gossypii</i>                                                                                                                                                                                                                                                                                 | Loss of tRNA <sup>Leu</sup> <sub>UAG</sub> ; evolution of tRNA <sup>Ala</sup> <sub>CAU</sub>                                                                                             | 5       |
| UAG: Stop→Ala               | Mitochondria of certain green algae                                                                                                                                                                                                                                                                                    | Unknown                                                                                                                                                                                  | 6       |
| UAG: Stop→Leu               | Mitochondria of certain green algae                                                                                                                                                                                                                                                                                    | Evolution of tRNA <sup>Leu</sup> <sub>CUA</sub>                                                                                                                                          | 6,7     |
| UAG: Stop→Pyl               | <b>Archaea</b><br>Methanosarcinales<br>Methanomassiliicoccales<br><b>Bacteria</b><br><b>Clostridia</b><br>Peptococcaceae,<br>Halobacteroidaceae,<br>Thermoanaerobacteraceae,<br>Ruminococcaceae<br><b>Negativicutes</b><br>Sporomusa, unclassified<br><b>δ-Proteobacteria</b><br>Desulfospira, Bilophila, unclassified | Evolution of tRNA <sup>Pyl</sup> <sub>CUA</sub> , pyrrolysyl-tRNA synthetase, and pyrrolysine biosynthesis genes <i>pylBCD</i> . Normally occurs as a gene cassette ( <i>pylTSBCD</i> ). | 8-10    |
| UAR <sup>b</sup> : Stop→Gln | Certain green algae and phages                                                                                                                                                                                                                                                                                         | Evolution of tRNA <sup>Gln</sup> with UUA and CUA anticodons                                                                                                                             | 11      |
| UCA: Ser→Stop               | Mitochondria of <i>Scenedesmus</i>                                                                                                                                                                                                                                                                                     | Loss of tRNA <sup>Ser</sup> <sub>UGA</sub>                                                                                                                                               | 12,13   |
| UGA: Stop→Gly               | SR1 bacteria,<br>Gracilibacteria (ACD78, ACD80)                                                                                                                                                                                                                                                                        | Evolution of tRNA <sup>Gly</sup> <sub>UCA</sub><br>divergent D-arm and anticodon stem                                                                                                    | 14      |
| UGA: Stop→Cys               | <i>Euplotes</i> spp.                                                                                                                                                                                                                                                                                                   | Evolution of tRNA <sup>Cys</sup> <sub>UCA</sub> ; eRF1 does not recognize UGA                                                                                                            | 15,16   |
| UGA: Stop→Trp               | Certain Firmicutes; mitochondria of most eukaryotic microorganisms                                                                                                                                                                                                                                                     | Mutation of tRNA <sup>Trp</sup> <sub>CCA</sub> to tRNA <sup>Trp</sup> <sub>CUA</sub> or C-to-U editing of tRNA <sup>Trp</sup> <sub>CCA</sub>                                             | 2,17,18 |

**Codon recoding**

|                          |                                                                                                                                                                                                                                                                                                                                            |                                                                                                                                                                                                                                                                                                                                                                                                                                                                         |       |
|--------------------------|--------------------------------------------------------------------------------------------------------------------------------------------------------------------------------------------------------------------------------------------------------------------------------------------------------------------------------------------|-------------------------------------------------------------------------------------------------------------------------------------------------------------------------------------------------------------------------------------------------------------------------------------------------------------------------------------------------------------------------------------------------------------------------------------------------------------------------|-------|
| Recoded UGA:<br>Stop→Sec | <p><b>Bacteria</b><br/>Found in certain species from the phyla:<br/>Firmicutes, Proteobacteria, Acidobacteria, Aquificae, Chloroflexi, Spirochaetes, Actinobacteria</p> <p><b>Archaea</b><br/>Restricted to: <i>Methanopyrus kandleri</i>, Methanococcales</p> <p><b>Eukarya</b><br/>In most clades excluding higher plants and fungi.</p> | <p>Particular UGA codons are recoded by downstream adjacent SECIS (in bacteria and archaea) or SECIS in 3'UTR (eukaryotes).</p> <p>Requires tRNA<sup>Sec</sup><sub>UCA</sub>, selenophosphate synthase (<i>seI/D</i>), Sec elongation factor (<i>seI/B</i> or EF-Sec), and Sec synthase (<i>seI/A</i>) in bacteria or phosphoseryl-tRNA<sup>Sec</sup> kinase (PSTK) and Sep-tRNA<sup>Sec</sup>:Sec-tRNA<sup>Sec</sup> synthase (SepSecS) in archaea and eukaryotes.</p> | 19-22 |
| Recoded UGA:<br>Cys→Sec  | <i>Euplotes</i> spp.                                                                                                                                                                                                                                                                                                                       | SECIS elements in the 3'UTR recode certain UGA=Cys codons to Sec                                                                                                                                                                                                                                                                                                                                                                                                        | 15    |

**Ambiguous decoding**

|                                     |                                                                                           |                                                                               |       |
|-------------------------------------|-------------------------------------------------------------------------------------------|-------------------------------------------------------------------------------|-------|
| ACN: Thr and Ser                    | <i>Escherichia coli</i> , <i>Mycoplasma</i> and likely other bacteria; yeast mitochondria | Loss of ThrRS editing due to oxidative stress or mutations                    | 23-25 |
| CUG: Leu and Ser                    | <i>Candida</i> and Ascomycetes                                                            | tRNA with CAG anticodon recognized by both leucyl- and seryl-tRNA synthetases | 26-28 |
| CUN, UUA, UUG:<br>Leu, Ile, and Val | <i>Mycoplasma</i>                                                                         | Loss of LeuRS editing                                                         | 24    |
| UUC, UUU: Phe, Tyr                  | <i>Mycoplasma</i> ; yeast mitochondria                                                    | Loss of PheRS editing                                                         | 29    |
| Mistranslation at all codons        | Most microorganisms                                                                       | Reduced ribosomal fidelity due to mutations, antibiotics, or starvation       | 30    |

<sup>a</sup> N=A, U, G or C

<sup>b</sup> R=A or G

## References

1. Plotkin, J.B. & Kudla, G. Synonymous but not the same: the causes and consequences of codon bias. *Nat. Rev. Genet.* **12**, 32-42 (2011).
2. Sengupta, S., Yang, X. & Higgs, P.G. The mechanisms of codon reassignments in mitochondrial genetic codes. *J. Mol. Evol.* **64**, 662-88 (2007).
3. Li, M. & Tzagoloff, A. Assembly of the mitochondrial membrane system: sequences of yeast mitochondrial valine and an unusual threonine tRNA gene. *Cell* **18**, 47-53 (1979).
4. Su, D. *et al.* An unusual tRNAThr derived from tRNAHis reassigns in yeast mitochondria the CUN codons to threonine. *Nucleic Acids Res.* **39**, 4866-74 (2011).
5. Ling, J., Daoud, R., Lajoie, M.J., Söll, D. & Lang, B.F. Natural reassignment of CUU and CUA sense codons to alanine in *Ashbya* mitochondria. *Nucleic Acids Res.* **42**, 499-508 (2014).
6. Hayashi-Ishimaru, Y., Ohama, T., Kawatsu, Y., Nakamura, K. & Osawa, S. UAG is a sense codon in several chlorophycean mitochondria. *Curr. Genet.* **30**, 29-33 (1996).
7. Laforest, M.J., Roewer, I. & Lang, B.F. Mitochondrial tRNAs in the lower fungus *Spizellomyces punctatus*: tRNA editing and UAG 'stop' codons recognized as leucine. *Nucleic Acids Res.* **25**, 626-32 (1997).
8. Hao, B. *et al.* A new UAG-encoded residue in the structure of a methanogen methyltransferase. *Science* **296**, 1462-6 (2002).
9. Srinivasan, G., James, C.M. & Krzycki, J.A. Pyrrolysine encoded by UAG in Archaea: charging of a UAG-decoding specialized tRNA. *Science* **296**, 1459-62 (2002).
10. Prat, L. *et al.* Carbon source-dependent expansion of the genetic code in bacteria. *Proc. Natl. Acad. Sci. USA* **109**, 21070-5 (2012).
11. Ivanova, N.N. *et al.* Stop codon reassignments in the wild. *Science* **344**, 909-13 (2014).
12. Kuck, U., Jekosch, K. & Holzamer, P. DNA sequence analysis of the complete mitochondrial genome of the green alga *Scenedesmus obliquus*: evidence for UAG being a leucine and UCA being a non-sense codon. *Gene* **253**, 13-8 (2000).
13. Lang, B.F., Lavrov, D., Beck, N. & Steinberg, S.V. in *Organelle Genetics* (ed. Bullerwell, C.E.) 431-474 (Springer, 2012).
14. Campbell, J.H. *et al.* UGA is an additional glycine codon in uncultured SR1 bacteria from the human microbiota. *Proc. Natl. Acad. Sci. USA* **110**, 5540-5 (2013).
15. Turanov, A.A. *et al.* Genetic code supports targeted insertion of two amino acids by one codon. *Science* **323**, 259-61 (2009).
16. Salas-Marco, J. *et al.* Distinct paths to stop codon reassignment by the variant-code organisms *Tetrahymena* and *Euplotes*. *Mol. Cell. Biol.* **26**, 438-47 (2006).
17. Wrighton, K.C. *et al.* Fermentation, hydrogen, and sulfur metabolism in multiple uncultivated bacterial phyla. *Science* **337**, 1661-5 (2012).
18. Alfonzo, J.D., Blanc, V., Estevez, A.M., Rubio, M.A. & Simpson, L. C to U editing of the anticodon of imported mitochondrial tRNATrp allows decoding of the UGA stop codon in *Leishmania tarentolae*. *EMBO J.* **18**, 7056-62 (1999).
19. Stadtman, T.C. Selenocysteine. *Annu. Rev. Biochem.* **65**, 83-100 (1996).
20. Zhang, Y., Romero, H., Salinas, G. & Gladyshev, V.N. Dynamic evolution of selenocysteine utilization in bacteria: a balance between selenoprotein loss and evolution of selenocysteine from redox active cysteine residues. *Genome Biol.* **7**, R94 (2006).
21. Su, D. *et al.* How an obscure archaeal gene inspired the discovery of selenocysteine biosynthesis in humans. *IUBMB Life* **61**, 35-9 (2009).
22. Yoshizawa, S. & Böck, A. The many levels of control on bacterial selenoprotein synthesis. *Biochim. Biophys. Acta* **1790**, 1404-14 (2009).
23. Wu, J., Fan, Y. & Ling, J. Mechanism of oxidant-induced mistranslation by threonyl-tRNA synthetase. *Nucleic Acids Res.* **42**, 6523-31 (2014).
24. Li, L. *et al.* Naturally occurring aminoacyl-tRNA synthetases editing-domain mutations that cause mistranslation in *Mycoplasma* parasites. *Proc. Natl. Acad. Sci. USA* **108**, 9378-83 (2011).

25. Ling, J. *et al.* Yeast mitochondrial threonyl-tRNA synthetase recognizes tRNA isoacceptors by distinct mechanisms and promotes CUN codon reassignment. *Proc. Natl. Acad. Sci. USA* **109**, 3281-6 (2012).
26. Yokogawa, T. *et al.* Serine tRNA complementary to the nonuniversal serine codon CUG in *Candida cylindracea*: evolutionary implications. *Proc. Natl. Acad. Sci. USA* **89**, 7408-11 (1992).
27. Santos, M.A., Keith, G. & Tuite, M.F. Non-standard translational events in *Candida albicans* mediated by an unusual seryl-tRNA with a 5'-CAG-3' (leucine) anticodon. *EMBO J.* **12**, 607-16 (1993).
28. Suzuki, T., Ueda, T. & Watanabe, K. The 'polysemous' codon--a codon with multiple amino acid assignment caused by dual specificity of tRNA identity. *EMBO J.* **16**, 1122-34 (1997).
29. Yadavalli, S.S. & Ibba, M. Selection of tRNA charging quality control mechanisms that increase mistranslation of the genetic code. *Nucleic Acids Res.* **41**, 1104-12 (2013).
30. Zaher, H.S. & Green, R. Fidelity at the molecular level: lessons from protein synthesis. *Cell* **136**, 746-62 (2009).
